# Supplementary material
Source: HighWire-hosted journal article supplement (https://www.annfammed.org/highwire/filestream/8352/field_highwire_adjunct_files/0/Dresang_Supp_Fig_1.pdf)

# ANNALS OF FAMILY MEDICINE

## Online Supplementary Material

Deline J, Varnes-Epstein L, Dresang LT, Gideonsen M, Lynch L, Frey JJ. Low primary cesarean rate and high VBAC rate with good outcomes in an Amish birthing center. *Ann Fam Med*. 2012;10(6):530-537.

<http://www.annfammed.org/content/full/10/6/530>

---

### Supplemental Figure 1. LaFarge Birthing Center.

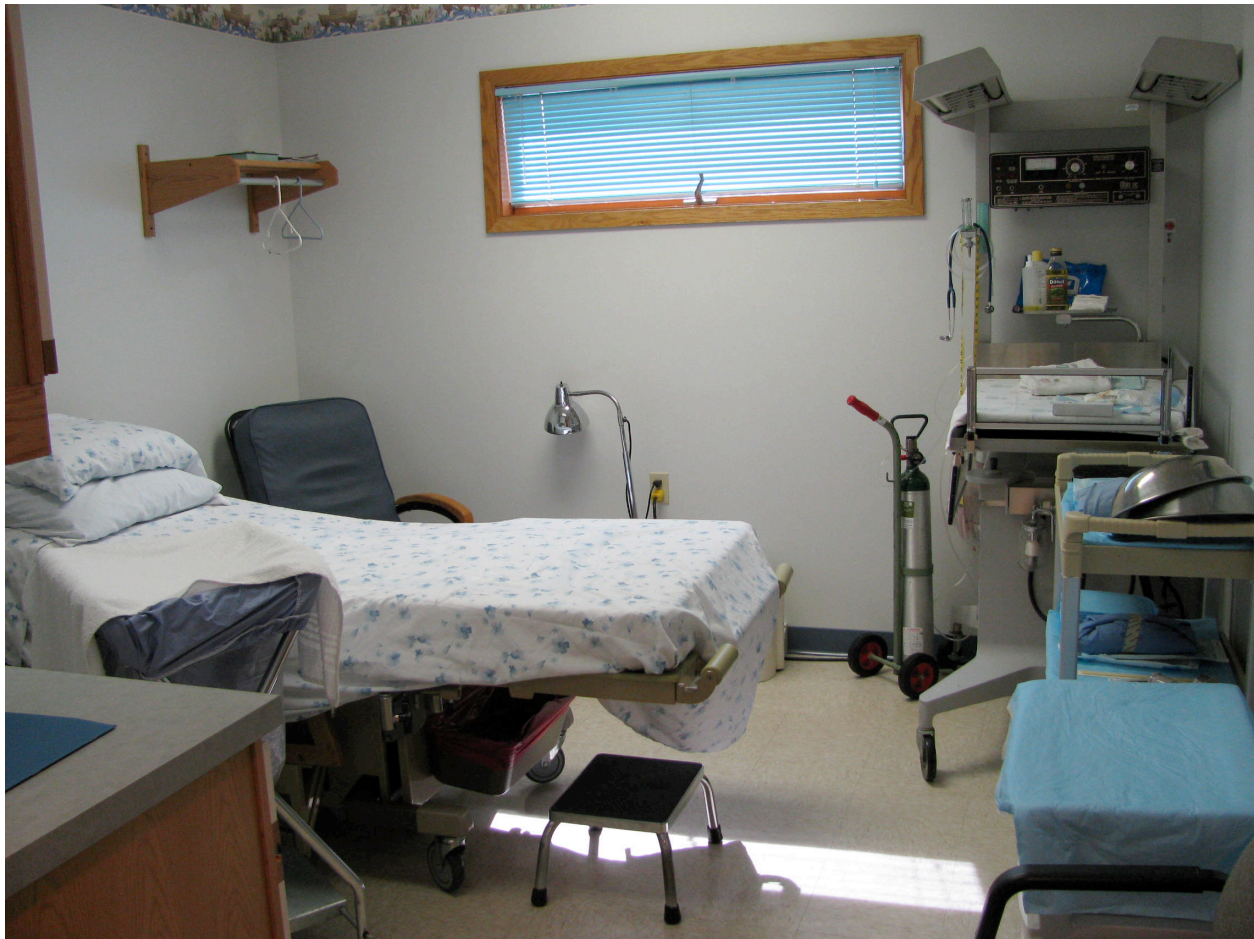

Supplement: Dresang_Supp_Fig_1.pdf [file Dresang_Supp_Fig_1.pdf]
